# Supplementary material
Source: PubMed Central journal article supplement (PMC7255620)
Supplement: NIHMS1589324-supplement-Supplemental_Pictures_S1_-_S5.pdf [file NIHMS1589324-supplement-Supplemental_Pictures_S1_-_S5.pdf]

**Supplemental picture descriptions:**

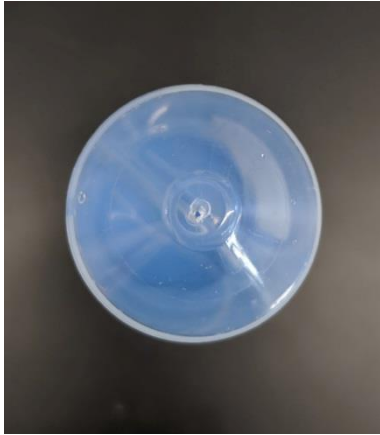

**Picture S1:** A modified 50ml conical tube with a small hole made at the bottom with a 25-gauge hypodermic needle.

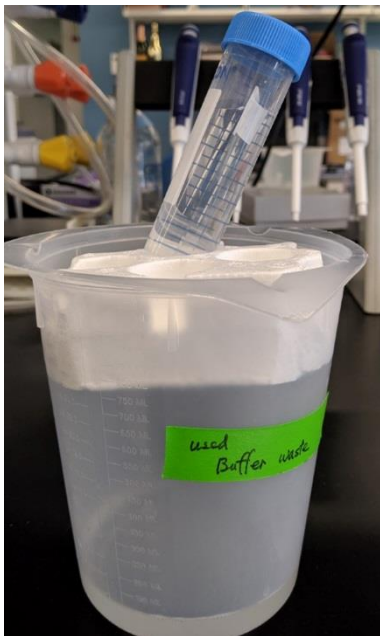

**Picture S2:** Modified 50ml conical containing 25ml lysis buffer with cap screwed on, angled at 35° in preparation for lysis and fiber generation steps.

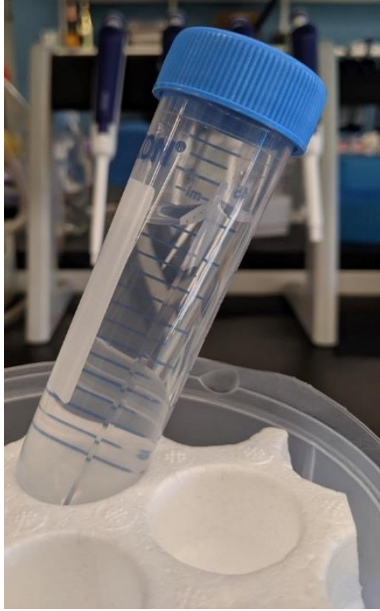

**Picture S3:** A zoom-in picture of S2.

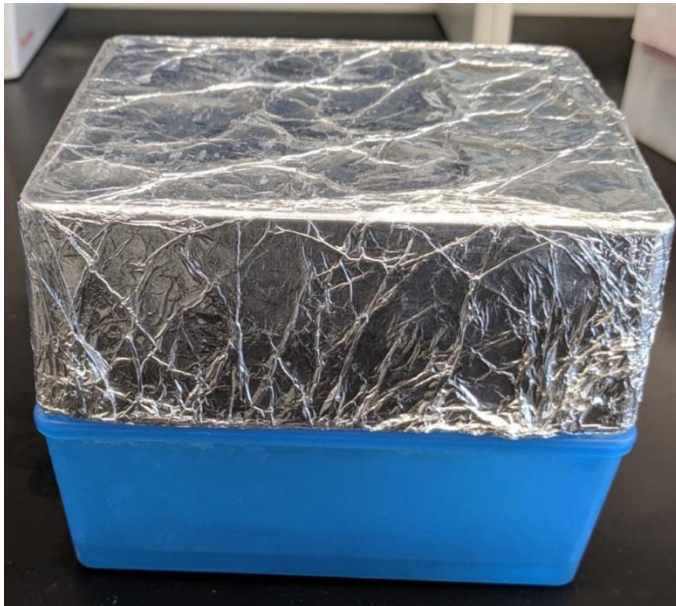

**Picture S4:** Humid chamber made with a P1000 tip box. The lid is wrapped with tin foil to minimize light exposure to slides placed inside. Lid should be placed on when slides are inside.

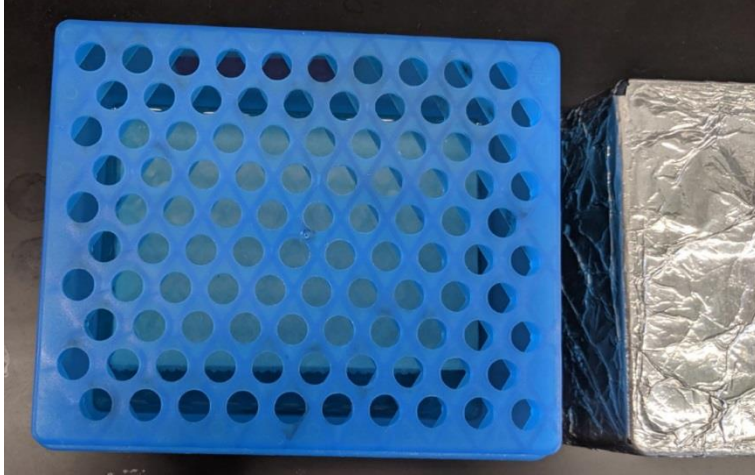

**Picture S5:** Humid chamber with lid off.
